# Supplementary material for: Hydrothermal syntheses, structures and luminescent properties of Zn(ii) coordination polymers assembled with benzene-1,2,3-tricarboxylic acid involving in situ ligand reactions
Source: Royal Society of Chemistry journal article supplement (doi:10.1039/c0ce00950d), 2011-01-01
Supplement: c0ce00950d.pdf [file c0ce00950d.pdf]

## Hydrothermal syntheses, structures and luminescent properties of Zn(II) coordination polymers assembled with benzene-1,2,3-tricarboxylic acid involving in situ ligand reactions

Wenlong Liu,<sup>\*a,b</sup> Jianghua Yu,<sup>a</sup> Jiaxun Jiang,<sup>a</sup> Limin Yuan,<sup>a</sup> Bin Xu,<sup>a</sup> Qiang Liu,<sup>a</sup> Botao Qu,<sup>a</sup> Guoqing Zhang<sup>a</sup> and Chaoguo Yan<sup>\*a</sup>

<sup>a</sup> College of Chemistry and Chemical Engineering, Yangzhou University, Yangzhou, 225002, China. Fax: 86 514 87975244; Tel: 86 514 87975290; E-mail: [liuwl@yzu.edu.cn](mailto:liuwl@yzu.edu.cn).

<sup>b</sup> State Key Laboratory of Coordination Chemistry, Nanjing University, China.

### Electronic Supporting Information

**Page S2: Table S1** Selected bond lengths (Å) and angles (°) for complexes **1-5**

**Page S3: Table S2** Hydrogen Bonds (Å, °) for **1**.

**Table S3** The dihedral angles of different coordination conformations in compounds **1-5** and **R1**

**Table S4** The statistics of the powder XRD preferred orientation for compounds **1-5**

**Page S4: Fig. S1** (a) An illustration of the bimetallic 26-member ring in **1**. (b) Packing diagram of the 3D network of **1** viewed down the crystallographic *a*-axis.

**Fig. S2** (a) The interactions between C6 and the imidazole rings of six ligands in **2**. (b) View of the 3D supramolecular framework through C- $\pi$  between 2D layers of **2**.

**Page S5: Fig. S3** (a) A 1D double chain composed of Zn1 and 1,2,3-btc<sup>3-</sup>. (b) 3D network pillared by 4,4'-bpy ligands in **3**.

**Fig. S4** The coordination conformations of bbi in **4**.

**Page S6: Fig.S5** (a) Two helical array (*RL*) and (*LR*) go to two different directions. (b) View of the 3D network constructed from [Zn<sub>3</sub>(1,2,3-btc)<sub>2</sub>] layers (red ones) and bbi helical chains. (c) 3D porous framework of **4**.

**Fig. S6** (a) View of the 1D double *meso*-helical chain. (b) View of the 3D supramolecular framework through C-H... $\pi$  interactions. (c) and (d) The C-H... $\pi$  interactions between 1D chains in **5**.

**Page S7: Fig. S7** Simulated and experimental XRPD patterns of **1-5**.

**Page S8-S9: Fig. S8** The final Rietveld refinement plots of **1** (a), **2** (b), **3** (c), **4** (d) and **5** (e)

**Page S10: Fig.S9** TG curves of complexes **1-5**.

**Page S11: Fig. S10** TGA curve for **2** from RT to 1200°C in nitrogen environment

**Page S11: Fig. S11** TGA curve for **5** from RT to 1375°C in nitrogen environment

**Page S11-S12:** The high temperature TGA and ZnO ex-situ analysis

**Table S1** Selected bond lengths (Å) and angles (°) for complexes **1-5**<sup>a</sup>

---

|               |             |               |            |                |            |
|---------------|-------------|---------------|------------|----------------|------------|
| <b>1</b>      |             |               |            |                |            |
| Zn1-O1        | 1.943(2)    | Zn1-O4#1      | 1.966(2)   | Zn1-N1         | 1.988(2)   |
| Zn1-N4 #2     | 1.997(2)    | O1-Zn1-O4#1   | 115.86(8)  | O1-Zn1-N1      | 114.68(8)  |
| O4#1-Zn1-N1   | 99.33(7)    | O1-Zn1-N4#2   | 110.52(9)  | O4#1-Zn1- N4#2 | 100.92(8)  |
| N1-Zn1-N4#2   | 114.42(8)   |               |            |                |            |
| <b>2</b>      |             |               |            |                |            |
| Zn1-O5#1      | 1.947(2)    | Zn1-O1        | 1.957(2)   | Zn1-N3         | 2.024(3)   |
| Zn1-N1        | 2.039(3)    | O1-Zn1-O5#1   | 130.13(10) | O5#1-Zn2-N3    | 106.94(10) |
| O1-Zn1-N3     | 103.59(10)  | O5#1-Zn1-N1   | 96.32(10)  | O1-Zn1-N1      | 110.91(10) |
| N3-Zn1-N1     | 107.544(11) |               |            |                |            |
| <b>3</b>      |             |               |            |                |            |
| Zn1-O3        | 1.981(5)    | Zn1-O5#2      | 1.957(6)   | Zn1-O2#1       | 1.942(5)   |
| Zn1-N1        | 2.005(6)    | Zn2-O7        | 2.066(9)   | Zn2-O8         | 2.123(11)  |
| Zn2-N2#3      | 2.138(7)    | Zn2-O1        | 2.161(5)   | O2#1-Zn1-O5#2  | 129.3(3)   |
| O2#1-Zn1-O3   | 95.2(2)     | O5#2-Zn1-O3   | 98.7(2)    | O2#1-Zn1-N1    | 113.5(2)   |
| O5#2-Zn1-N1   | 104.3(3)    | O3-Zn1-N1     | 114.5(2)   | O7-Zn2-O8      | 180.00(1)  |
| O7-Zn2-N2#3   | 92.3(2)     | O8-Zn2-N2#3   | 87.7(2)    | O7-Zn2-O1      | 90.18(15)  |
| O8-Zn2-O1     | 89.82(15)   | N2#3-Zn2-O1   | 92.1(2)    | N2#4-Zn2-O1    | 87.9(2)    |
| O1#5-Zn2-O1   | 179.6(3)    | N2#3-Zn2-N2#4 | 175.4(4)   |                |            |
| <b>4</b>      |             |               |            |                |            |
| Zn1-O1        | 1.985(3)    | Zn1-O11#1     | 1.986(3)   | Zn1-N1         | 2.001(4)   |
| Zn1-N5        | 2.023(4)    | Zn2-O6        | 1.968(3)   | Zn2-N9         | 1.991(4)   |
| Zn1-O1        | 1.950(3)    | Zn2-O5#2      | 1.936(3)   | Zn2-O9         | 2.019(3)   |
| Zn2-N7#2      | 2.051(4)    | Zn3-O7        | 1.980(3)   | Zn3-N3#3       | 2.011(4)   |
| Zn3-N11#1     | 2.041(4)    | Zn3-O4#4      | 2.233(4)   | Zn3-O3#4       | 2.233(4)   |
| O1-Zn1-O11#1  | 124.98(13)  | O1-Zn1-N1     | 107.06(14) | O11#1-Zn1-N1   | 105.16(13) |
| O1-Zn1-N5     | 96.48(13)   | O11#1-Zn1-N5  | 11.42(14)  | N1-Zn1-N5      | 111.48(15) |
| O6-Zn2-N9     | 123.71(14)  | O6-Zn2-O9     | 110.17(12) | N9-Zn2-O9      | 113.38(14) |
| O6-Zn2-N7#2   | 101.58(14)  | N9-Zn2-N7#2   | 104.77(15) | O9-Zn2-N7#2    | 99.21(13)  |
| O7-Zn3-N3#3   | 105.20(14)  | O7-Zn3-N11#1  | 94.35(14)  | N3#3-Zn3-N11#1 | 103.17(16) |
| O7-Zn3-O4#4   | 101.60(12)  | N3#3-Zn3-O4#4 | 146.81(15) | N11#1-Zn3-O4#4 | 93.88(14)  |
| O7-Zn3-O3#4   | 134.33(13)  | N3#3-Zn3-O3#4 | 88.22(14)  | N11#1-Zn3-O3#4 | 125.37(14) |
| O4#4-Zn3-O3#4 | 58.86(13)   |               |            |                |            |
| <b>5</b>      |             |               |            |                |            |
| Zn1-O1        | 1.946(2)    | Zn1-O4#1      | 1.963(2)   | Zn1-N3#2       | 1.999(2)   |
| Zn1-N1        | 2.018(2)    | O1-Zn1-O4#1   | 117.37(8)  | O1-Zn1-N3#2    | 110.71(8)  |
| O4#1-Zn1-N3#2 | 106.53(9)   | O1-Zn1-N1     | 114.51(8)  | O4#1-Zn1-N1    | 92.83(8)   |
| N3#2-Zn1-N1   | 113.71(9)   |               |            |                |            |

---

<sup>a</sup>Symmetry codes. For **1**: #1 x-1,y,z; #2 -x,-y,-z. For **3**: #1 x,y-1,z. For **4**: #1 -x+1/2,y+1/2,-z+1/2; #2 -x+1/2,y-1/2,-z+1/2; #3 -x+1/2,-y+3/2,-z; #4 x+1/2,-y+3/2,z+1/2; #5 -x+1,y,-z+1/2. For **5**: #1 -x+1,y+1/2,-z+3/2; #2 x,-y+1/2,z-1/2; #3 -x+2,-y,-z+2; #4 x-1,y,z. For **6**: #1 x+1,-y-1/2,z+1/2; #2 x-1,-y-1/2,z-1/2.

---

**Table S2** Hydrogen Bonds ( $\text{\AA}$ ,  $^\circ$ ) for **1**

| D–H...A        | $r$ (D–H) | $r$ (H...A) | $r$ (D...A) | $\alpha$ (D–H...A) | Symmetry operation |
|----------------|-----------|-------------|-------------|--------------------|--------------------|
| O5–H5...N6     | 0.8200    | 1.8000      | 2.604(4)    | 167.00             | 1-x,1-y,1-z        |
| C4–H4...O3     | 0.9300    | 2.4400      | 2.752(4)    | 100.00             |                    |
| C6–H6...O1     | 0.9300    | 2.3900      | 2.719(3)    | 100.00             |                    |
| C10–H10...O2   | 0.9300    | 2.4100      | 3.091(4)    | 130.00             |                    |
| C11–H11...O5   | 0.9300    | 2.5900      | 3.512(4)    | 173.00             | -1+x, y, z         |
| C13–H13B...O4  | 0.9700    | 2.5200      | 3.419(5)    | 153.00             | 1-x,1-y,-z         |
| C15–H15...O1   | 0.9300    | 2.5800      | 3.472(4)    | 160.00             | -x,1-y,-z          |
| C16–H16...O3   | 0.9300    | 2.5600      | 3.378(4)    | 147.00             | -1+x,y,-1+z        |
| C20–H20A...O3  | 0.9700    | 2.4300      | 3.260(4)    | 143.00             | -1+x,y,-1+z        |
| C20–H20B...O1W | 0.9700    | 2.5700      | 3.453(9)    | 151.00             | 1-x,1-y,-z         |
| C21–H21...O6   | 0.9300    | 2.4200      | 3.279(4)    | 154.00             | 1-x,-y,-z          |
| C23–H23...O3   | 0.9300    | 2.6000      | 3.294(4)    | 132.00             | -1+x,y,-1+z        |
| C24–H24...O5   | 0.9300    | 2.4100      | 3.255(4)    | 151.00             | x,y,1+z            |

**Table S3** The dihedral angles of different coordination conformations in compounds **1-5** and **R1**

| Plane1           | Plane2 | a          | b          | c          | e          | d         |
|------------------|--------|------------|------------|------------|------------|-----------|
| phenyl ring      | CG1    | 19.673(13) | 30.790(5)  | 60.517(8)  | 55.500(6)  | 6.163(2)  |
| phenyl ring      | CG2    | 82.736(26) | 69.515(8)  | 64.240(8)  | 50.076(5)  | 80.295(8) |
| phenyl ring      | CG3    | 11.794(2)  | 33.630(5)  | 47.742(5)  | 50.519(6)  | 25.266(5) |
| CG1 <sup>a</sup> | CG3    | 29.908(3)  | 59.052(5)  | 87.465(12) | 83.955(12) | 30.198(5) |
| CG1              | CG2    | 77.439(22) | 59.573(8)  | 54.424(8)  | 54.615(8)  | 86.165(8) |
| CG2              | CG3    | 77.885(27) | 62.358(10) | 53.941(8)  | 50.239(8)  | 67.852(6) |

<sup>a</sup>CG represent carboxylate group.**Table S4** The statistics of the powder XRD preferred orientation for compounds **1-5**

| Sample   | Dir 1 |           | Dir 2   |           | Fraction of Dir 1 |
|----------|-------|-----------|---------|-----------|-------------------|
|          | H K L |           | H K L   |           |                   |
| <b>1</b> | 0 0 1 | 0.8509154 | 0 3 0   | 0.8878835 | 0.3385876         |
| <b>2</b> | 1 1 0 | 0.8178393 | 0 0 2   | 0.3665267 | 0.8006425         |
| <b>3</b> | 0 0 2 | 0.6329221 | 1 -1 -1 | 0.1345561 | 0.8582032         |
| <b>4</b> | 0 1 1 | 0.1159393 | 1 0 1   | 0.126422  | 0.02893791        |
| <b>5</b> | 0 2 0 | 0.1366501 | 1 1 0   | 0.1194237 | 0.1099115         |

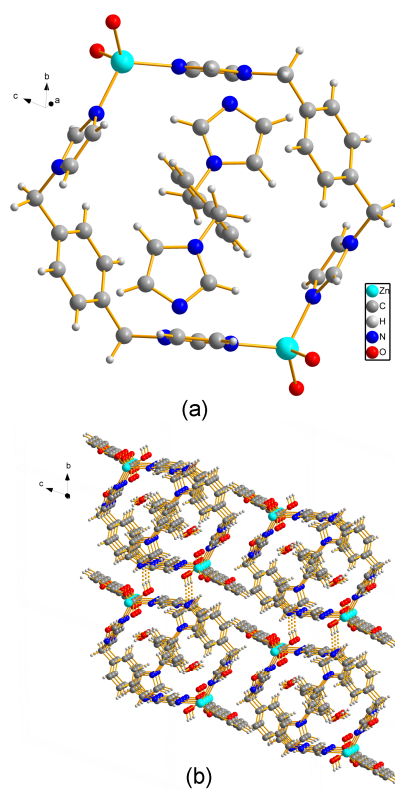

**Fig. S1** (a) An illustration of the bimetallic 26-member ring in **1**. (b) Packing diagram of the 3D network of **1** viewed down the crystallographic *a*-axis.

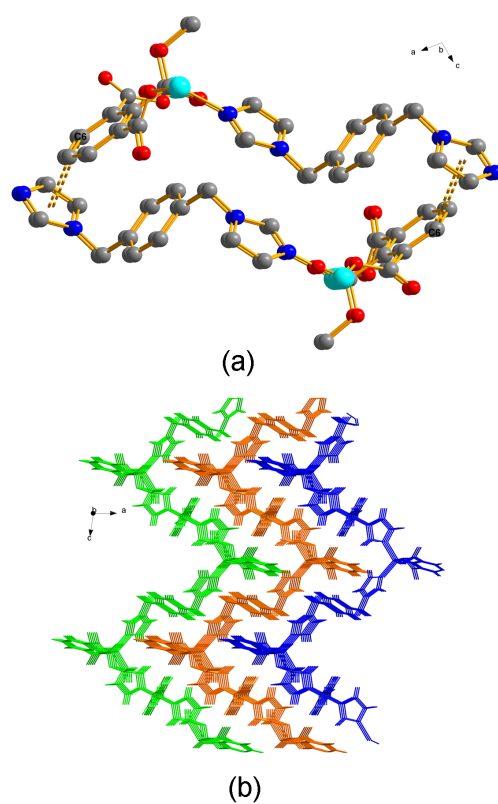

**Fig. S2** (a) The interactions between C6 and the imidazole rings of bix ligands in **2**. (b) View of the 3D supramolecular framework through C- $\pi$  between 2D layers of **2**.

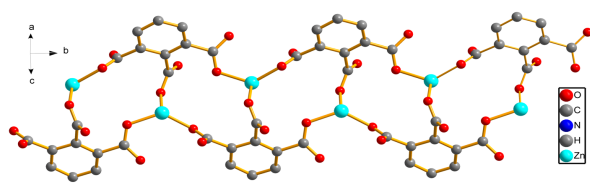

(a)

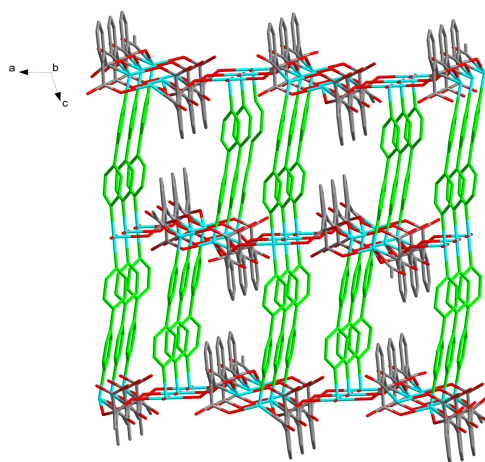

(b)

**Fig. S3** (a) A 1D double chain composed of Zn1 and 1,2,3-btc<sup>3-</sup>. (b) 3D network pillared by 4,4'-bpy ligands in **3**.

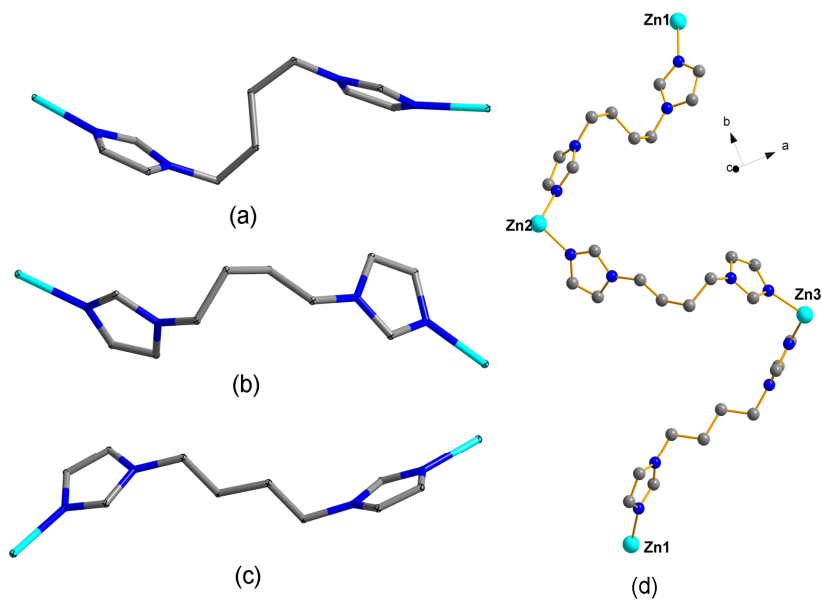

**Fig. S4** The coordination conformations of bbi in **4**.

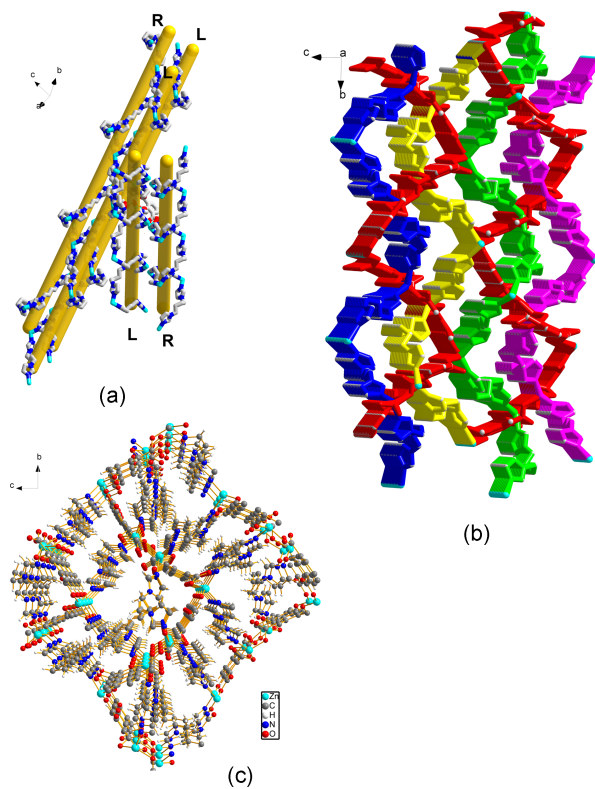

**Fig.S5** (a) Two helical array (*RL*) and (*LR*) go to two different directions. (b) View of the 3D network constructed from  $[Zn_3(1,2,3-btc)_2]$  layers (red ones) and bbi helical chains. (c) 3D porous framework of **4**.

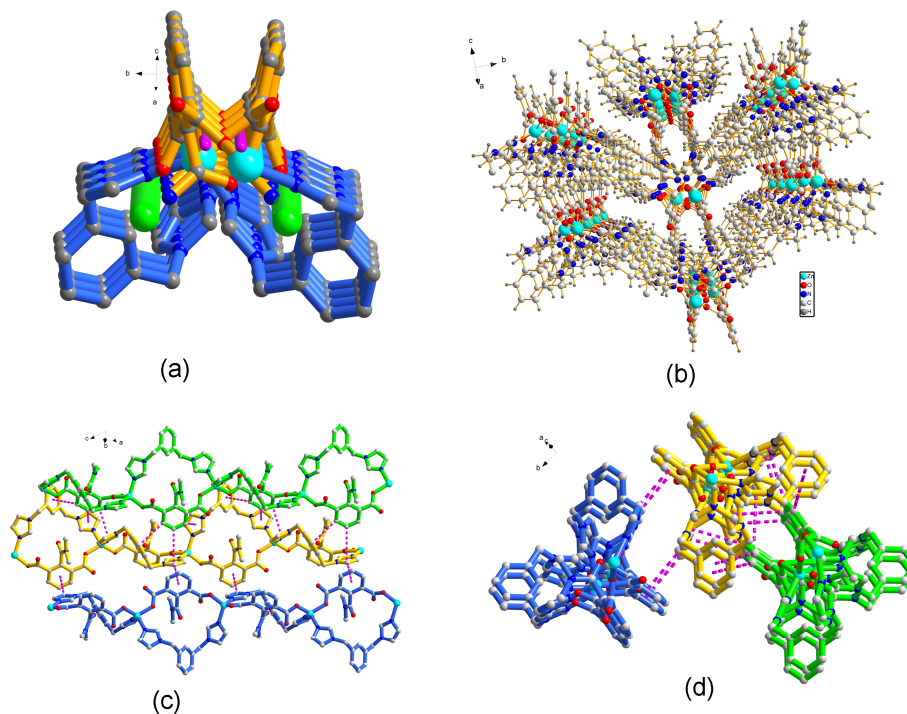

**Fig. S6** (a)View of the 1D double *meso*-helical chain. (b) View of the 3D supramolecular framework through C–H... $\pi$  interactions. (C) and (d) The C–H... $\pi$  interactions between 1D chains in **5**.

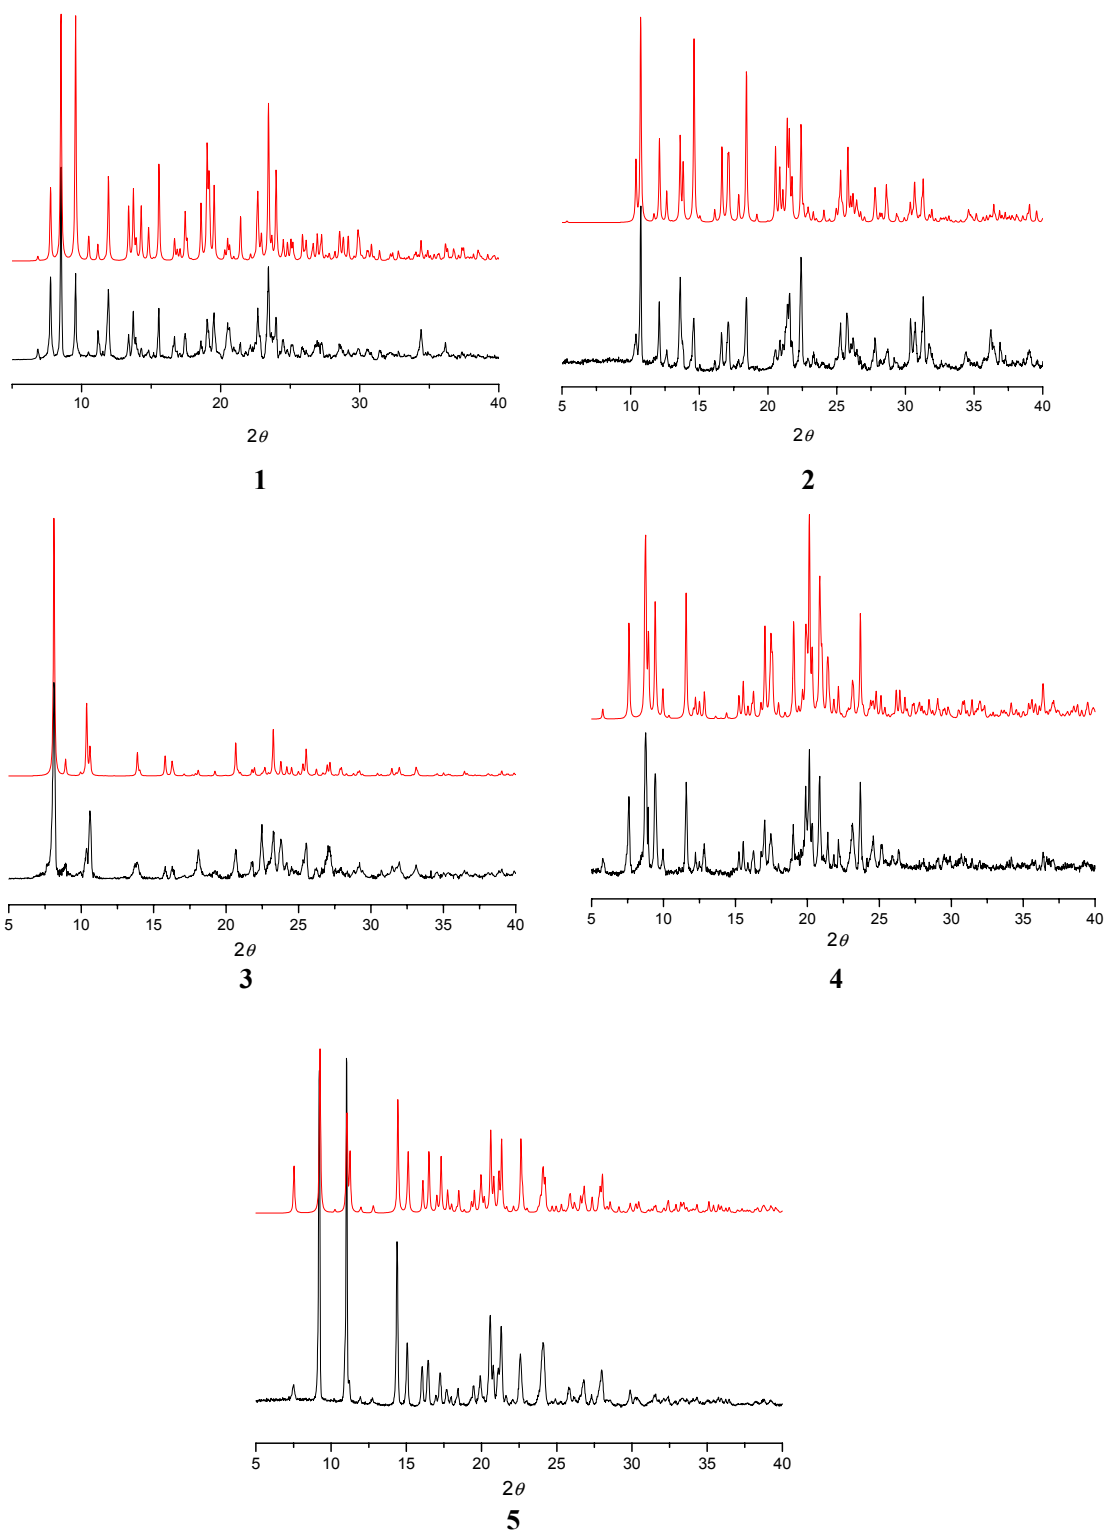

**Fig. S7** Simulated(red) and experimental XRPD patterns of **1-5**.

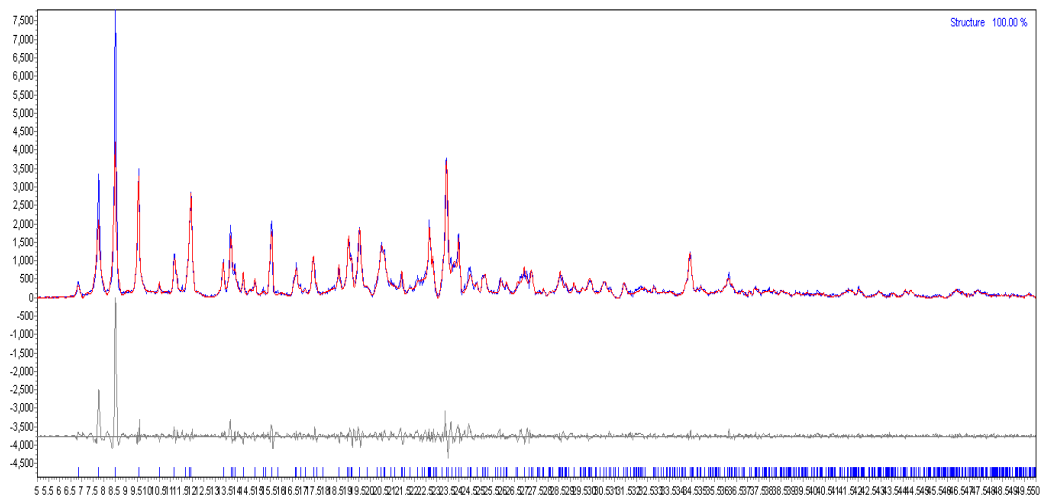

$R_{wp}$ : 10.27  $R_p$ : 7.72

(a)

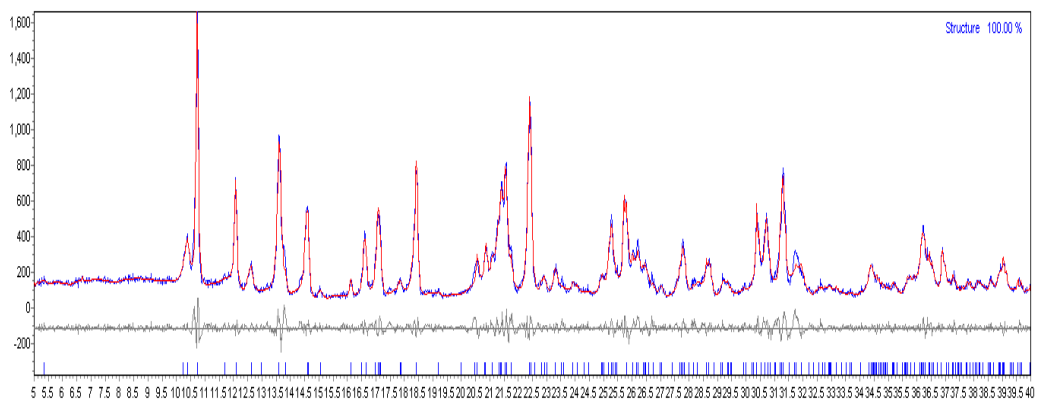

$R_{wp}$ : 10.02  $R_p$ : 7.69

(b)

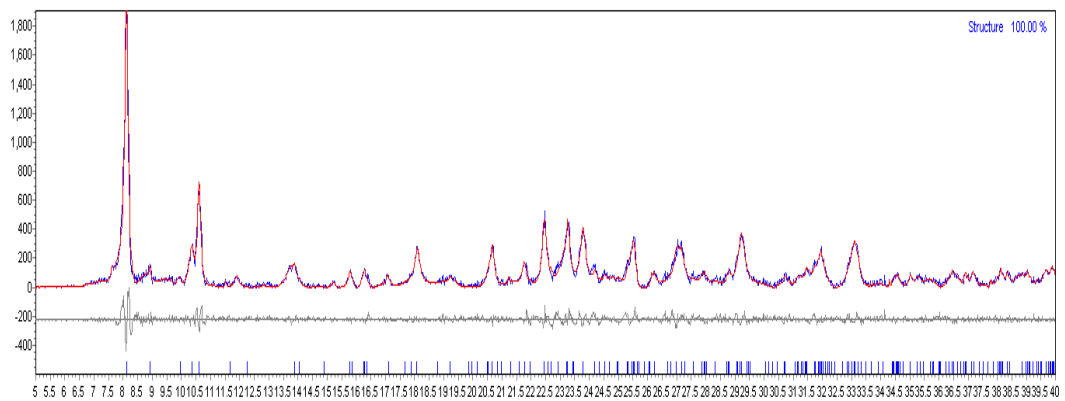

$R_{wp}$ : 12.98  $R_p$ : 9.94

(c)



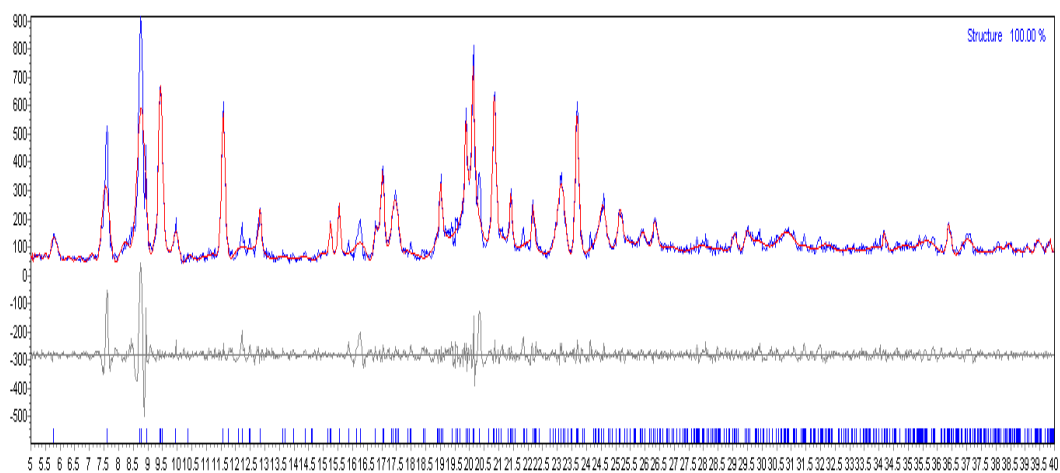

$R_{wp}$ : 13.93     $R_p$ : 10.15

(d)

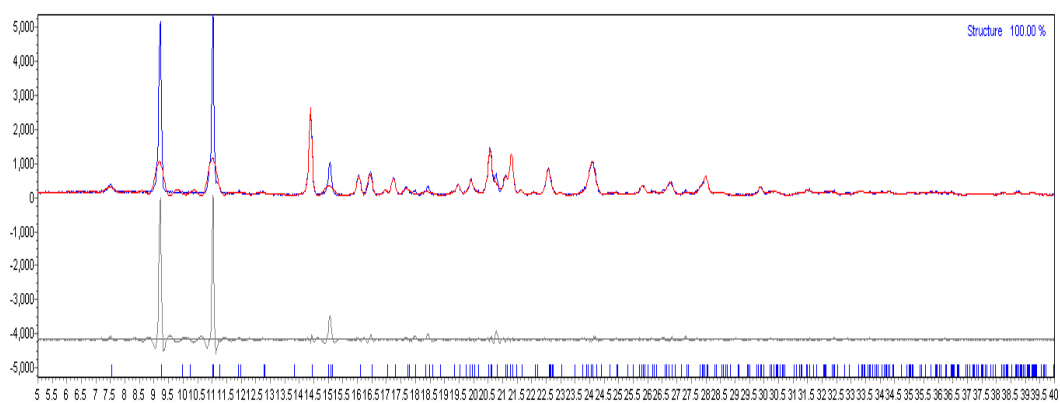

$R_{wp}$ : 9.04     $R_p$ : 6.79

(e)

**Fig. S8** The final Rietveld refinement plots of **1** (a), **2** (b), **3** (c), **4** (d) and **5** (e): experimental pattern (blue), calculated pattern (red), and difference profile (bottom gray line). Stick marks (|) at the bottom of the pattern indicate peak positions allowed by the unitcell parameters and space group.

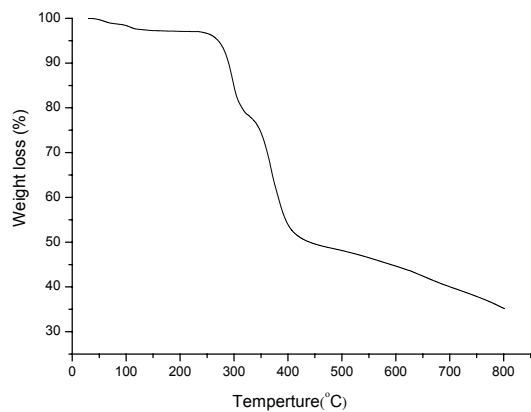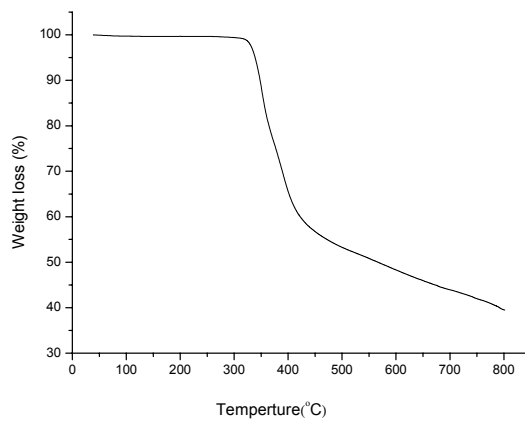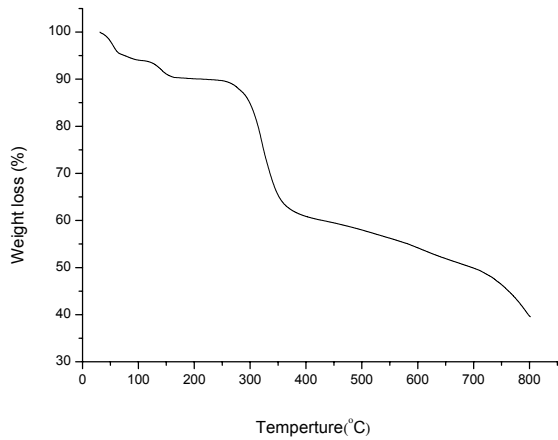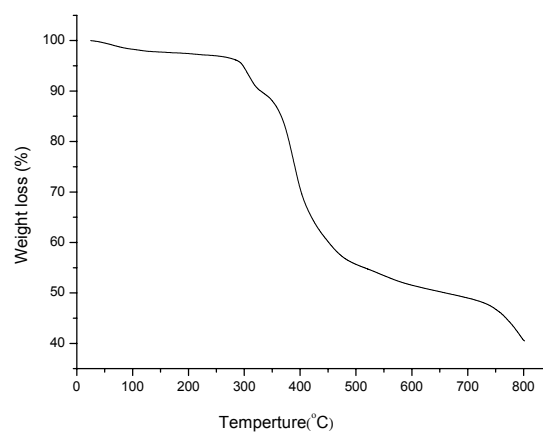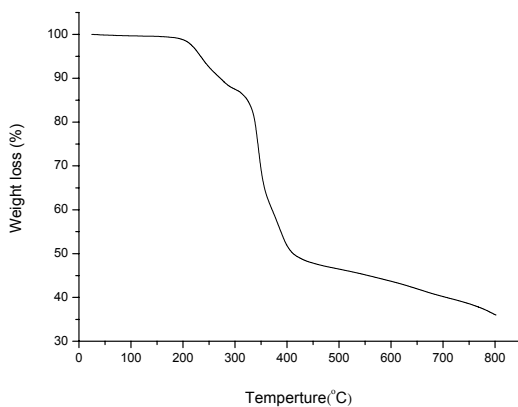

**Fig. S9** TG curves of complexes 1-5.

### The high temperature TGA and ZnO ex-situ analysis

The high temperature TGA experiments in nitrogen environment were carried out for compound **2** and **5** (see following Fig. S10 and Fig. S11). As shown in following Figures, the curves are same as the results of prior experiments before 800°C, but a continuous weight loss occurred from 800 to 1200°C for **2**, without a definite endpoint in the experiments, even if the temperature to 1400°C for **5**. The decomposition mechanisms might be the carboreduction in nitrogen environment. The organic ligands were decomposed to CO or C in nitrogen environment, then CO or C reduced the ZnO to Zn at higher temperature. The boiling point of metallic Zn is 907°C.

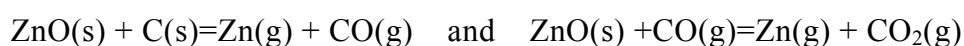

Similar researches have been reported.<sup>1-3</sup>

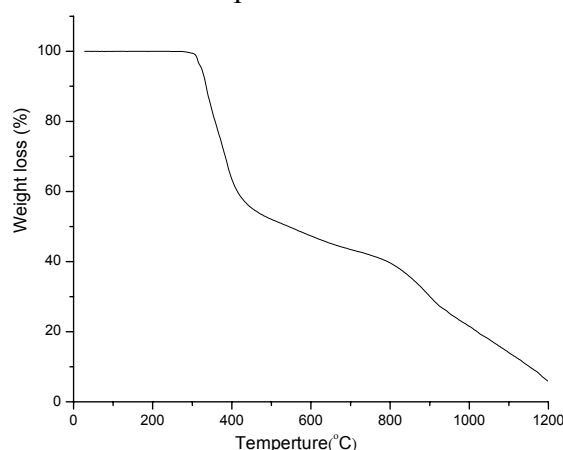

**Fig. S10** TGA curve for **2** from RT to 1200°C in nitrogen environment

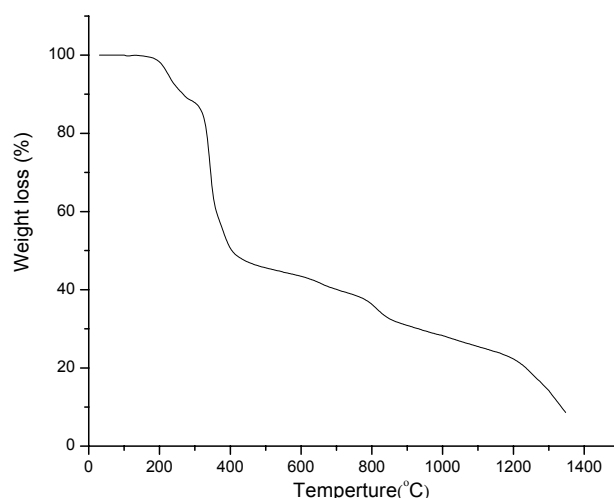

**Fig. S11** TGA curve for **5** from RT to 1375°C in nitrogen environment

Because the amount of remaining residue after TGA is small (about 2 mg), we can not to characterize them by powder XRD. In order to decompose samples to ZnO and confirm the sample purity, about 200 mg samples were placed in a Muffle Furnace, which were heated at 800°C for 2 hr in air. Gravimetric analysis was used to analyze the ZnO contents. The results are listed in following Table S5. The purity of remaining residue was confirmed by x-ray diffraction (Fig. S12).

**Table S5** The results of ZnO contents by Gravimetric analysis

| Sample   | Weight (mg) |              | ZnO(%)   |            |
|----------|-------------|--------------|----------|------------|
|          | Start       | After heated | Observed | Calculated |
| <b>1</b> | 203.8       | 25.7         | 12.61    | 12.54      |
| <b>2</b> | 211.5       | 32.9         | 15.56    | 15.48      |
| <b>3</b> | 201.3       | 48.3         | 23.99    | 23.89      |
| <b>4</b> | 208.8       | 42.4         | 20.31    | 20.21      |
| <b>5</b> | 213.2       | 28.4         | 13.32    | 13.29      |

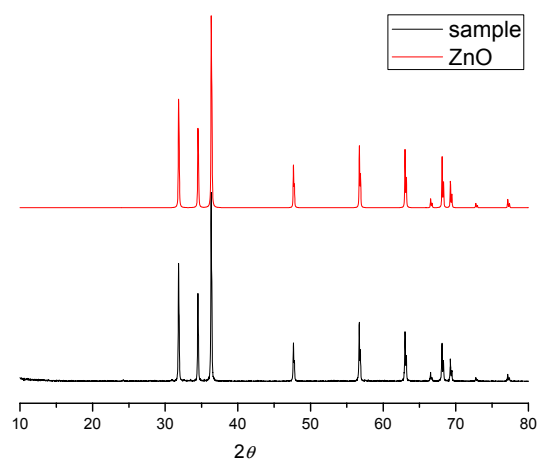

**Fig. S12** The powder XRD pattern of the remaining residue after heated at 800°C for 2 hr in air.

## References

1. J. V.D.S. Araújo, R.V. Ferreira, M. I. Yoshida and V. M. D. Pasa, *Solid State Sci.*, 2009, **11**, 1673.
2. M. H. Huang, S. Mao, H. Feick, H. Yan, Y. Wu, H. Kind, E. Weber, R. Russo, and P. Yang, *Science*, 2001, **292**, 1897.
3. K. Subannajui, N. Ramgir, R. Grimm, R. Michiels, Y. Yang, S. Müller and M. Zacharias *Cryst. Growth Des.*, 2010, **10**, 1585.
